# Supplementary material
Source: publisher figshare collection journal article supplement (https://acs.figshare.com/ndownloader/files/3791287)
Supplement: Supplementary file 1 [file 3791287]

# The Role of Valence Electron Concentration in Tuning the Structure, Stability, and Electronic Properties of $\text{Mo}_6\text{S}_{9-x}\text{I}_x$ Nanowires

J. Karthikeyan,<sup>†</sup> Vijay Kumar,<sup>‡,¶</sup> and P. Murugan<sup>\*,†</sup>

*Functional Materials Division, CSIR-Central Electrochemical Research Institute, Karaikudi  
- 630003, Tamil Nadu, India, and Dr. Vijay Kumar Foundation, 1969 Sector 4, Gurgaon  
122 001, Haryana, India*

E-mail: murugan@cecri.res.in

Phone: +91-4565-241443. Fax: +91-4565-227779

---

<sup>\*</sup>To whom correspondence should be addressed

<sup>†</sup>Functional Materials Division, CSIR-Central Electrochemical Research Institute, Karaikudi - 630003, Tamil Nadu, India

<sup>‡</sup>Dr. Vijay Kumar Foundation, 1969 Sector 4, Gurgaon 122 001, Haryana, India

<sup>¶</sup>Center for Informatics, School of Natural Sciences, Shiv Nadar University, NH91, Tehsil Dadri, Gautam Budh Nagar 201 314, Uttar Pradesh, India

# Table of Contents

1. Various models of  $\text{Mo}_6\text{S}_{9-x}\text{I}_x$  NW and their physical properties.
2. Properties of NW isomers studied with two octahedra in a supercell.
3. Properties of NW isomers studied by doubling the supercell.
4. Atomic Structure of  $\text{Mo}_6\text{S}_3\text{I}_6$  NW proposed in previous reports.
5. Electronic Structure of  $\text{Mo}_6\text{S}_{7.5}\text{I}_{1.5}$  NW with two octahedra in the supercell.
6. Band Structure of  $\text{Li}_6\text{Mo}_6\text{S}_9$ ,  $\text{Li}_3\text{Mo}_6\text{S}_6\text{I}_3$ , and  $\text{Mo}_6\text{S}_2\text{I}_8$  NWs.

**Table. S 1: Various atomic models (A, B, ...) of  $\text{Mo}_6\text{S}_{9-x}\text{I}_x$  NWs that were explored for a given  $x$  by distributing S and I atoms in different ways.  $\text{O}_1$  and  $\text{O}_2$  represent two  $\text{Mo}_6$  octahedra in the unit cell while  $\text{P}_1$  and  $\text{P}_2$  represent the prism sites formed in between the octahedra. Here, S&I means that the  $\text{Mo}_3$  triangle is decorated with both S and I atoms without preserving  $\text{C}_{3v}$  symmetry. Starting with the configuration of  $\text{Mo}_6\text{S}_9$  with all the sites occupied by S atoms, three S atoms were replaced by I atoms symmetrically either on bridge positions or on the faces of the octahedra every time when  $x$  is increased by 1.5. The occupancies of S or I atoms at various sites for different values of  $x$ , the optimized lattice constant along the NW axis,  $c$  (Å), the energy of a given nw with respect to the lowest energy configuration,  $\Delta E$  (eV) are given. \* mark represents the models proposed in earlier theoretical work.**

| $x$             | 0.0  |      |      | 1.5 |      |      | 3.0  |      |      |      |      |      | 4.5  |      |      |      |      | 6.0  |      |      |      |      | 7.5  |      |  | 9.0 |
|-----------------|------|------|------|-----|------|------|------|------|------|------|------|------|------|------|------|------|------|------|------|------|------|------|------|------|--|-----|
| Model           | A    | A    | B    | A   | B*   | C    | D    | E    | F    | G    | H    | A*   | B    | C    | D    | E    | A*   | B    | C    | D    | E    | A    | B    | A    |  |     |
| $\text{P}_1$    | S    | S    | S    | I   | S    | S    | S    | S    | S    | S&I  | S&I  | S    | S    | I    | I    | I    | S    | I    | S    | I    | I    | S    | I    | I    |  |     |
| $\text{O}_1$    | S    | S    | I    | S   | S    | S    | I    | S    | S    | S&I  | S&I  | I    | I    | I    | S    | I    | I    | I    | I    | I    | I    | I    | I    | I    |  |     |
|                 | S    | S    | S    | S   | I    | I    | I    | S    | S    | S&I  | S&I  | I    | S    | I    | S    | S    | I    | S    | S    | S    | I    | I    | S    | I    |  |     |
| $\text{P}_2$    | S    | I    | S    | I   | S    | S    | S    | I    | I    | S&I  | S&I  | S    | I    | S    | I    | S    | S    | I    | I    | S    | I    | I    | I    | I    |  |     |
| $\text{O}_2$    | S    | S    | S    | S   | I    | S    | S    | I    | S    | S&I  | S&I  | S    | S    | S    | S    | I    | I    | I    | I    | I    | S    | I    | I    | I    |  |     |
|                 | S    | S    | S    | S   | S    | I    | S    | S    | I    | S&I  | S&I  | I    | I    | S    | I    | S    | I    | S    | I    | I    | S    | I    | I    | I    |  |     |
| $c$ (Å)         | 13.1 | 10.0 | 11.9 | 9.3 | 12.6 | 11.3 | 11.9 | 10.8 | 11.8 | 11.3 | 12.2 | 12.4 | 12.3 | 11.1 | 10.6 | 11.1 | 13.7 | 11.3 | 11.3 | 11.6 | 11.3 | 11.6 | 11.6 | 13.5 |  |     |
| $\Delta E$ (eV) | 0    | 0    | 1.29 | 0   | 1.92 | 3.06 | 3.17 | 1.26 | 2.69 | 3.32 | 3.61 | 3.01 | 1.57 | 1.99 | 0    | 1.69 | 4.42 | 0.98 | 1.21 | 1.84 | 0    | 1.90 | 0    | 0    |  |     |

**Table. S 2: Average Mo-Mo bond length at  $\text{P}_1$ ,  $\text{O}_1$ ,  $\text{P}_2$  and  $\text{O}_2$  sites of the lowest energy  $\text{Mo}_6\text{S}_{9-x}\text{I}_x$  NWs for various  $x$ .  $\angle\text{P}_1$  and  $\angle\text{P}_2$  are the average  $\angle\text{Mo-I-Mo}$  bridging angles in  $\text{P}_1$  and  $\text{P}_2$  sites, respectively.**

| $x$                          | 0.0            | 1.5  | 3.0  | 9.0  |
|------------------------------|----------------|------|------|------|
| $\text{P}_1(\text{Å})$       | 4.08           | 3.08 | 2.76 | 3.87 |
| $\text{O}_1(\text{Å})$       | 2.75/3.24/2.75 | 2.80 | 2.76 | 2.61 |
| $\angle\text{P}_1(^{\circ})$ | 124            | 77   | 61   | 84   |
| $\text{P}_2(\text{Å})$       | 4.07           | 2.85 | 2.85 | 5.07 |
| $\text{O}_2(\text{Å})$       | 2.70           | 2.83 | 2.73 | 2.61 |
| $\angle\text{P}_2(^{\circ})$ | 124            | 59   | 61   | 119  |

**Table. S 3:** Average Mo-Mo bond length in  $P_1$ ,  $O_1$ ,  $P_2$ ,  $O_2$ ,  $P_3$ ,  $O_3$ ,  $P_4$  and  $O_4$  sites in the supercell of the lowest energy model of  $\text{Mo}_6\text{S}_{9-x}\text{I}_x$  NWs with  $x = 4.5$ , 6.0, and 7.5.  $\angle P_1$ ,  $\angle P_2$ ,  $\angle P_3$  and  $\angle P_4$  are the average  $\angle \text{Mo-I-Mo}$  on the bridging sites of the prisms  $P_1$ ,  $P_2$ ,  $P_3$ , and  $P_4$  between the octahedra, respectively.

| $x$                    | 4.5  | 6.0  | 7.5  |
|------------------------|------|------|------|
| $P_1$                  | I    | I    | I    |
| $O_1$                  | I    | I    | I    |
| $P_2$                  | I    | I    | I    |
| $O_2$                  | S    | S    | I    |
| $P_3$                  | I    | I    | I    |
| $O_3$                  | S    | I    | S    |
| $P_4$                  | I    | I    | I    |
| $O_4$                  | S    | S    | I    |
| $c$ (Å)                | 10.0 | 10.6 | 11.6 |
| $P_1$                  | 3.33 | 3.43 | 4.54 |
| $O_1$                  | 2.63 | 2.63 | 2.69 |
| $P_2$                  | 3.46 | 3.44 | 3.65 |
| $O_2$                  | 2.75 | 2.71 | 2.69 |
| $P_3$                  | 3.06 | 3.47 | 3.39 |
| $O_3$                  | 2.78 | 2.63 | 2.66 |
| $P_4$                  | 3.11 | 3.44 | 3.37 |
| $O_4$                  | 2.76 | 2.71 | 2.69 |
| $\angle P_1(^{\circ})$ | 63   | 74   | 72   |
| $\angle P_2(^{\circ})$ | 75   | 74   | 103  |
| $\angle P_3(^{\circ})$ | 60   | 74   | 79   |
| $\angle P_4(^{\circ})$ | 67   | 74   | 73   |

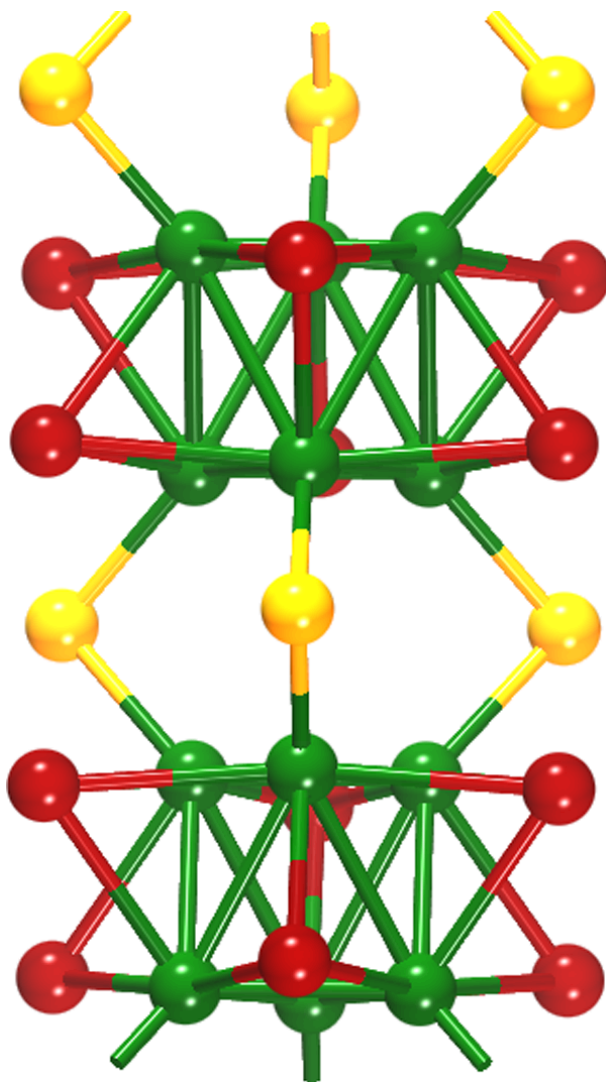

Figure. S 1: Atomic structure of Mo<sub>6</sub>S<sub>3</sub>I<sub>6</sub> NW proposed in earlier reports. Green, yellow, and dark red balls correspond to Mo, S, and I atoms, respectively.

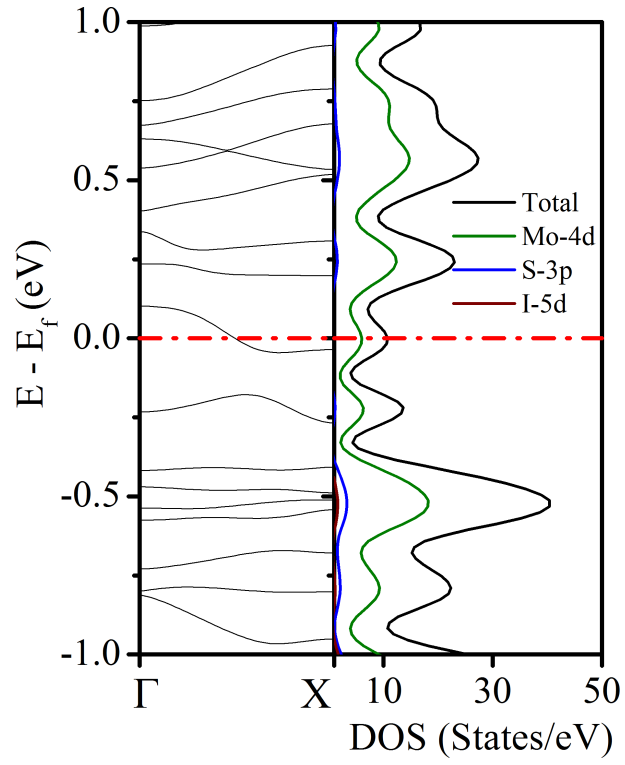

Figure. S 2: Electronic structure of  $\text{Mo}_6\text{S}_{7.5}\text{I}_{1.5}$  NW. The horizontal dashed line shows the  $E_f$ .

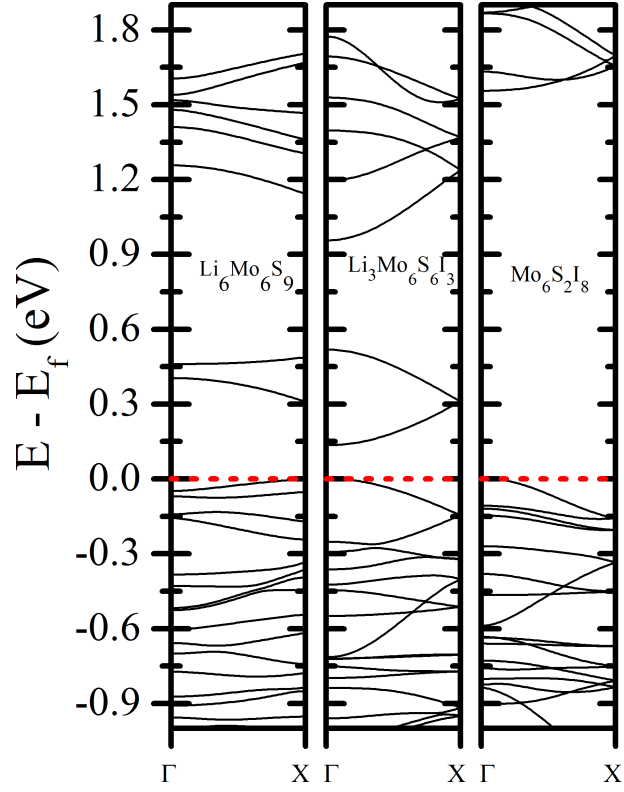

Figure. S 3: Band Structure of  $\text{Li}_6\text{Mo}_6\text{S}_9$ ,  $\text{Li}_3\text{Mo}_6\text{S}_6\text{I}_3$ , and  $\text{Mo}_6\text{S}_2\text{I}_8$  NWs. The horizontal dashed line shows the  $E_f$ . The composition of the NWs is written in the respective panels.
